# Supplementary material for: Aureolib — A Proteome Signature Library: Towards an Understanding of Staphylococcus aureus Pathophysiology
Source: PLOS journal article supplement (doi:10.1371/journal.pone.0070669), 2013-08-13
Supplement: S1 (10.1371/journal.pone.0070669.s001) [file journal.pone.0070669.s001]

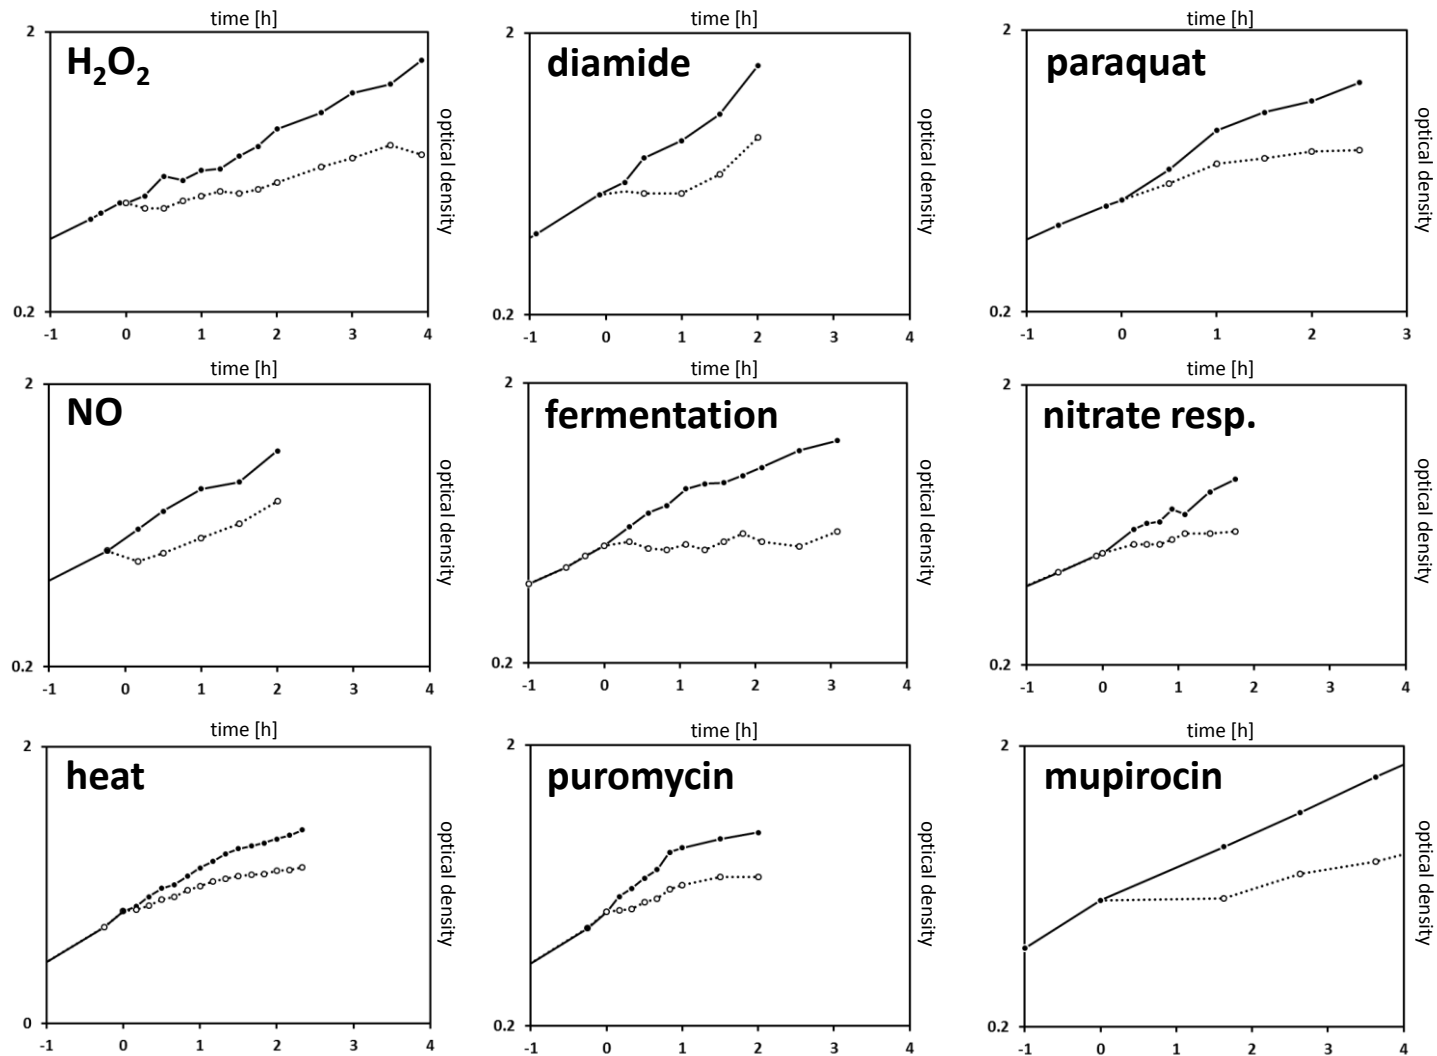

**Supplementary Fig. S1: Growth of *S. aureus* COL in response to different growth restricting conditions.** Cells were grown in synthetic medium at 37°C to an optical density of 0.5 at 500 nm. Subsequently 10 ml of the culture were exposed to the different stress conditions (• control culture, ° stressed culture).
