# Supplementary material for: Aureolib — A Proteome Signature Library: Towards an Understanding of Staphylococcus aureus Pathophysiology
Source: PLOS journal article supplement (doi:10.1371/journal.pone.0070669), 2013-08-13
Supplement: S4 (10.1371/journal.pone.0070669.s004) [file journal.pone.0070669.s004]

## Supplementary Figure S4

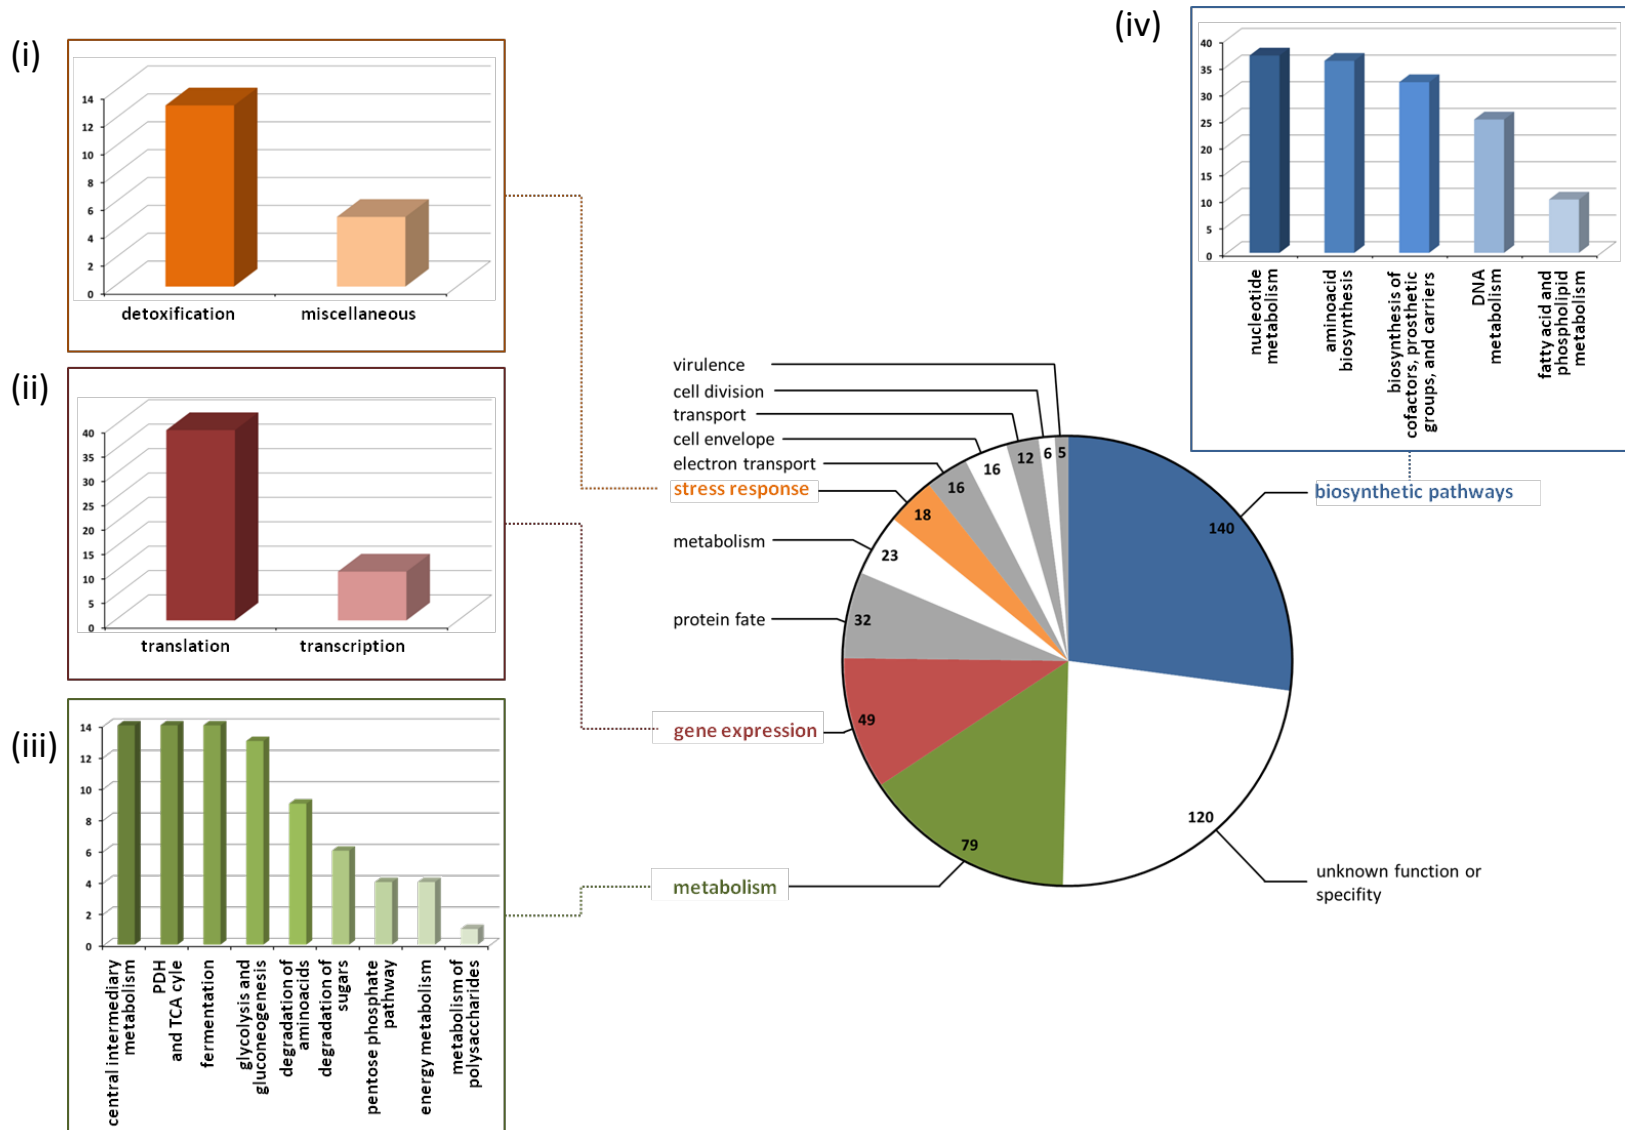

**Supplementary Fig. S4: Functional categories of the identified proteins.** The circle diagram shows the number of the identified proteins belonging to the indicated functional groups. A more detailed functional classification of proteins belonging to the functional groups (i) stress response (orange), (ii) gene expression (red), (iii) metabolism (green), and (iv) biosynthetic pathways (blue) is presented in bar charts.
